# Supplementary material for: A Multisite Randomized Controlled Trial of Mindfulness-Based Stress Reduction in the Treatment of Posttraumatic Stress Disorder
Source: Atypon-hosted journal article supplement (doi:10.1176/appi.prcp.20180002), 2018-09-14

**CONSORT Flow Diagram**  
**Randomized Controlled Trial of MBSR vs PCGT in Veterans with PTSD**

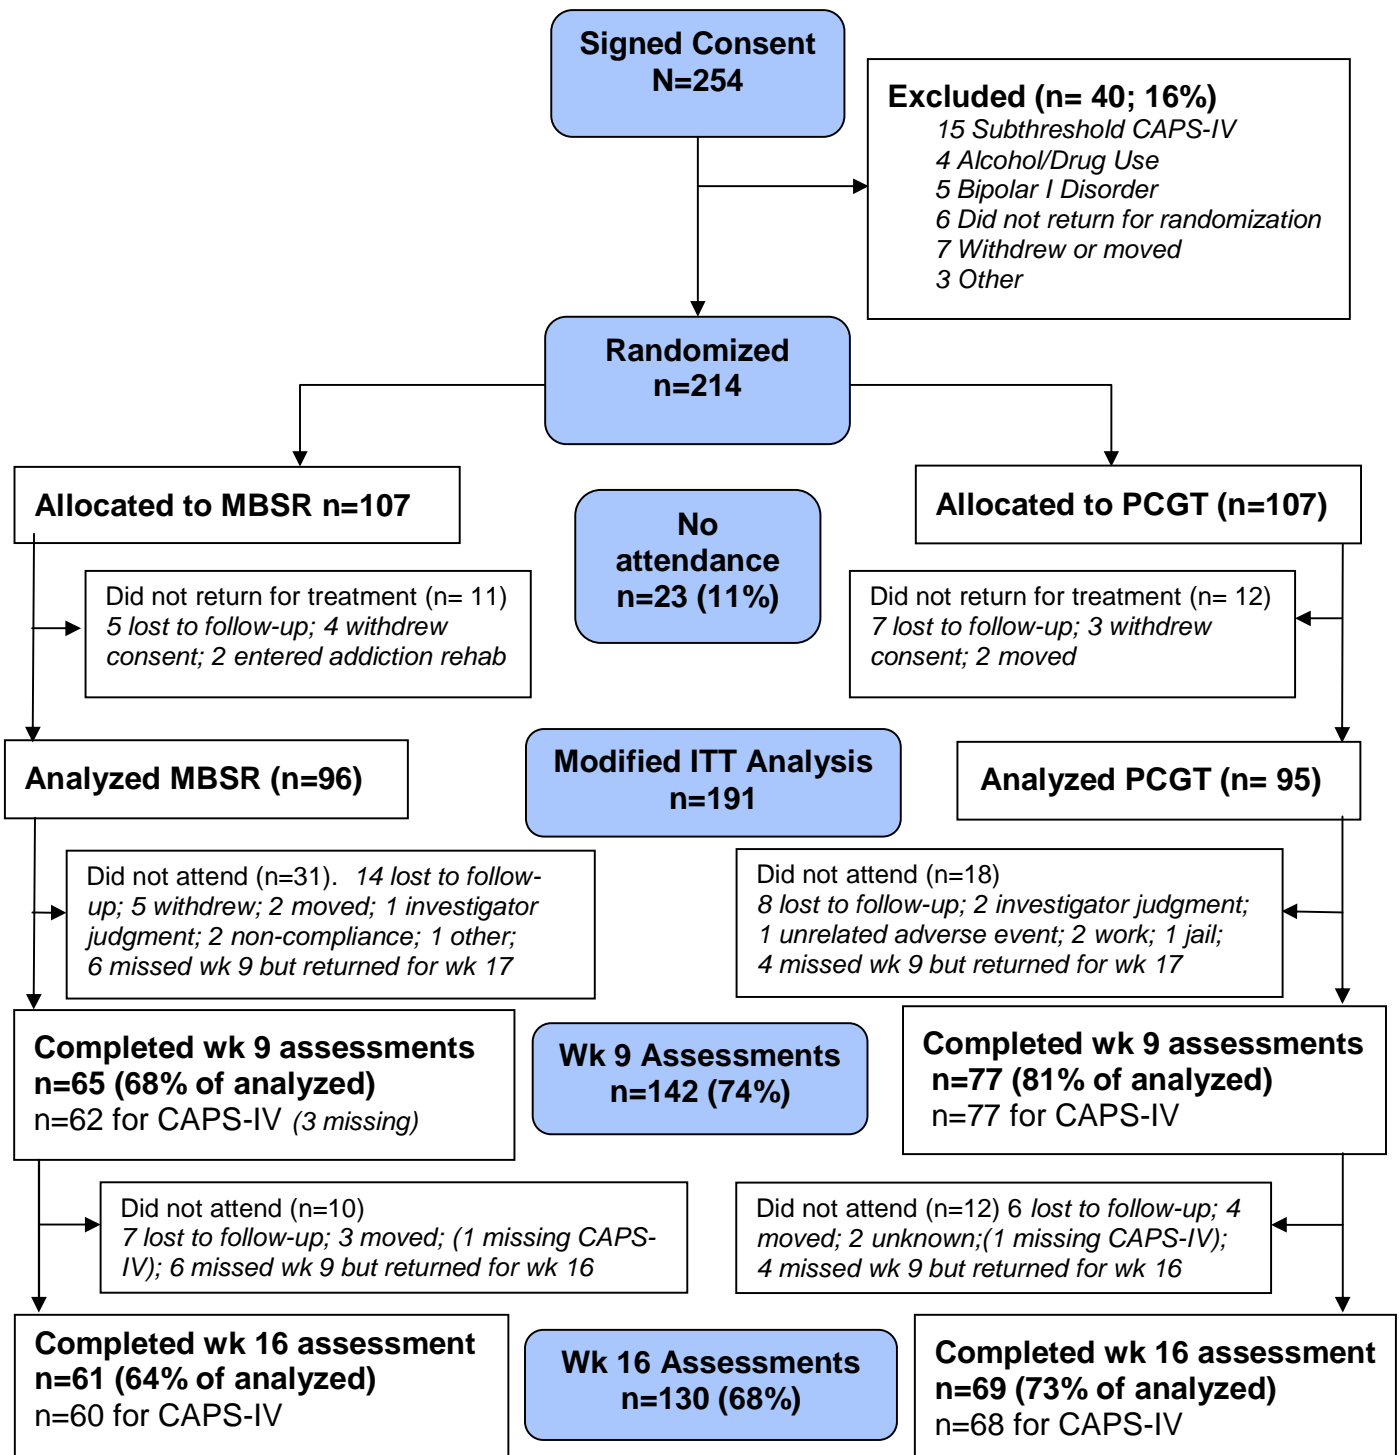

Supplement: appi.prcp.20180002.ds001.pdf [file appi.prcp.20180002.ds001.pdf]
